# Supplementary material
Source: PubMed Central journal article supplement (PMC5580904)
Supplement: 10.1194_M078980_jlr.M078980-1.pdf [file 10.1194_M078980_jlr.M078980-1.pdf]

## **SUPPLEMENTAL INFORMATION:**

### **Osteopontin regulates the crosstalk among phosphatidylcholine and cholesterol metabolism in mouse liver**

Maitane Nuñez-García<sup>1</sup>, Beatriz Gomez-Santos<sup>1</sup>, Xabier Buqué<sup>1,2</sup>, Juan L. García-Rodríguez<sup>1</sup>, Marta R. Romero<sup>3,4</sup>, Jose J.G. Marin<sup>3,4</sup>, Beatriz Arteta<sup>5</sup>, Carmelo García-Monzón<sup>4,6</sup>, Luis Castaño<sup>2,7</sup>, Wing-kin Syn<sup>8,9,10</sup>, Olatz Fresnedo<sup>1</sup> and Patricia Aspichueta<sup>1,2</sup>

<sup>1</sup>Department of Physiology, Faculty of Medicine and Nursing, University of the Basque Country, UPV/EHU, Spain; <sup>2</sup>Biocruces Health Research Institute, Spain; <sup>3</sup>Experimental Hepatology and Drug Targeting (HEVEFARM), IBSAL, University of Salamanca, Salamanca, Spain, <sup>4</sup>Center for the Study of Liver and Gastrointestinal Diseases (CIBERehd), Carlos III National Institute of Health, Madrid, Spain; <sup>5</sup>Department of Cellular Biology and Histology, Faculty of Medicine and Nursing, University of the Basque Country, UPV/EHU, Spain. <sup>6</sup>Liver Research Unit, Santa Cristina University Hospital, Instituto de Investigación Sanitaria Princesa, Madrid, Spain. <sup>7</sup>University of Basque Country UPV/EHU, Hospital Universitario Cruces, CIBERDEM, CIBERER, Spain; <sup>8</sup>Regeneration and Repair, Institute of Hepatology, Foundation for Liver Research, London, UK; <sup>9</sup> Division of Gastroenterology and Hepatology, Medical University of South Carolina, Charleston, South Carolina, USA; <sup>10</sup>Section of Gastroenterology, Ralph H Johnson Veteran Affairs Medical Center, Charleston, South Carolina, USA

**Supplemental Table S1. Antibodies used for immunoblotting.**

| Target Antibody       | Trading House  | Catalog Number | Dilution |
|-----------------------|----------------|----------------|----------|
| ACC                   | Cell Signaling | 3662S          | 1/1000   |
| P-ACC (S75)           | Cell Signaling | 3661S          | 1/1000   |
| AKT                   | Cell Signaling | 9272S          | 1/1000   |
| P-AKT (S473)          | Cell Signaling | 9271S          | 1/1000   |
| AMPK                  | Cell Signaling | 2603S          | 1/1000   |
| P-AMPK (T172)         | Cell Signaling | 2535S          | 1/1000   |
| CYP7A1 (H-58)         | Santa Cruz     | 25536          | 1/100    |
| ERK 1/2               | Cell Signaling | 9102S          | 1/1000   |
| P-ERK 1/2 (T202/Y204) | Cell Signaling | 9106S          | 1/2000   |
| FAK                   | Cell Signaling | 3285S          | 1/1000   |
| P-FAK (Y397)          | Cell Signaling | 3283S          | 1/1000   |
| JNK 1/2               | Cell Signaling | 9252S          | 1/2000   |
| P-JNK 1/2 (T183/Y185) | Promega        | V7931          | 1/2000   |
| GAPDH                 | Abcam          | 8245           | 1/20000  |
| Transferrin (I-20)    | Santa Cruz     | 22597          | 1/10000  |

ACC, acetyl-Coenzyme A carboxylase 1; AMPK, AMP-activated protein kinase; AKT, protein kinase B; CYP7A1, cholesterol 7- $\alpha$ -hydroxylase; ERK, Extracellular signal-related kinases 1/2; FAK, focal adhesion kinase; JNK, c-Jun N-terminal kinases 1/2. As a loading control GAPDH, glyceraldehyde-3-phosphate dehydrogenase; and transferrin were used.

**Supplemental Table S2. Oligonucleotides used for the quantitative PCR analysis.**

| Gene   | Accession    | Oligonucleotides                                          |
|--------|--------------|-----------------------------------------------------------|
| Abcb4  | NM_008830    | f: CGTCAGGTGTCTAAGGGAAATCAT<br>r: TAGCGGATATTTTCAGCGATCGT |
| Abcb11 | NM_021022    | f: AATGTTCAAGTTCCTCCGTTCAAAC<br>r: CTTTGGTGTGTCCCCATACTTG |
| Abcc3  | NM_029600    | f: CATCCTTGGCTACCGACGTC<br>r: GCAGCCGTTGTACCACCTTG        |
| Abcg5  | NM_031884    | f: TGTGATTGTCACCATCCACCAG<br>r: CCACAGAACACCAACTCTCCGT    |
| Abcg8  | NM_026180    | f: TTCACAGCCCACAATCTGGTG<br>r: ATGTCAGAGCGAGGCTGGTG       |
| Actb   | NM_007393    | f: ATCGCTGACAGGATGCAGAAG<br>r: TCAGGAGGAGCAATGATCTTGA     |
| Alb    | NM_009654    | f: CAACATTTCAAAGGCCTAGTCTCG<br>r: CCTGCACTAATTTGGCATGCTC  |
| Ces1d  | NM_053200    | f: CATTGCTGGTCTGGTTGCTACTC<br>r: CGCAGGCAATGAACCATAACA    |
| Chka   | NM_013490    | f: GCTGTCGTGTGGATGCTAGA<br>r: CCGTGGTTAAGGACTGCT          |
| Chkb   | NM_007692    | f: AGCCTCAAGGACGAGATGAA<br>r: TGGCTCTGAAAGCAACAAGA        |
| Ch25h  | NM_009890    | f: CTCTTCGACACCGAGATCTTCG<br>r: TTCTGGTGATGCACCTTGTGG     |
| Etnk2  | NM_175443    | f: AGTGGATGCCAATGAAGACC<br>r: CCAAGCCTAGCAGGATGAAG        |
| Gapdh  | NM_001289726 | f: TATGACTCCACTCACGGCAAATT<br>r: TCGCTCCTGGAAGATGGTGAT    |
| Hmgcr  | NM_008255    | f: AACATGTTCAACGGCAACAAC<br>r: CGCGTTATCGTCAGGATGATG      |
| Hnf4a  | NM_008261    | f: AGAACCCCCACACAACAGGAC<br>r: GAGCATGGACAACCTGTTCTGAC    |
| Npc1   | NM_008720    | f: AGGCAGACCAACCAATACATGC<br>r: GGCAGACTTGTGAAGGACTGTTTC  |
| Nr5a2  | NM_030676    | f: GCAATCAGCAAGCAGGCAG<br>r: CTTAGGCTCTTTTGGCATGCA        |
| Pcyt1a | NM_001163159 | f: CTGGCCCTAATGGAGCAACA<br>r: AGGAGCTGGCTGCCGTAAC         |
| Pcyt2  | NM_024229    | f: GCCTTTGACCTGTTCCACAT<br>r: CCGGTTTACTTCCTGGTCAA        |
| Pemt   | NM_001290011 | f: GAGCTGGCTGCTGGGTTACAT<br>r: CAGAAGAGTGGGTTGAACACAATG   |
| Ppia   | NM_008907    | f: CCAAGACTGAGTGGCTGGATG<br>r: GCTCCATGGCTTCCACAATG       |

|         |              |                                                           |
|---------|--------------|-----------------------------------------------------------|
| Slc10a1 | NM_001177561 | f: ATCGCCATAGTGGCCCAGTAC<br>r: CCTCAATGCTGGTCAGATGAAAG    |
| Srebf2  | NM_033218    | f: CCTGTGGAGCAGTCTAACGTC<br>r: GCTTTTGCCAGAGTGCTGTCC      |
| Soat1   | NM_009230    | f: GCCGTACAAGTTGCTCACACAC<br>r: AGACTTCCCAAACACTGTACGGATG |
| Soat2   | NM_146064    | f: TGCGGTTTGGAGACAGGATG<br>r: CATGGACCACGACGTTCCAG        |

---

Abcb4 (MDR2), multidrug resistance protein 2; Abcb11 (BSEP), bile salt export pump; Abcc3 (MRP3), canalicular multispecific organic anion transporter 2; Abcg5, ATP-binding cassette sub-family G member 5; Abcg8, ATP-binding cassette sub-family G member 8; Chka, choline kinase alpha; Chkb, choline/ethanolamine kinase; Ch25h, cholesterol 25-hydroxylase; Etnk2, ethanolamine kinase 2; Hnf4a, hepatocyte nuclear factor 4-alpha; Hmgcr, 3-hydroxy-3-methylglutaryl-Coenzyme A reductase; Ncp1, Niemann-Pick type C1; Nr5a2 (LRH1), liver receptor homolog 1; Pcyt1a, choline-phosphate cytidylyltransferase A; Pcyt2, ethanolamine-phosphate cytidylyltransferase; Pent, phosphatidylethanolamine N-methyltransferase; Slc10a1 (NTCP), sodium/bile acid cotransporter; Srebf2, sterol regulatory element binding factor 2; Soat1 (Dgat1), acyl-CoA:diacylglycerol acyltransferase 1; Soat2 (Dgat2), acyl-CoA:diacylglycerol acyltransferase 2. For normalization the following genes were used: Actb, actin; Alb, albumin; Gapdh, glyceraldehyde-3-phosphate dehydrogenase; Ppia, cyclophilin A.

f, forward primer; r, reverse primer.
